# Supplementary material
Source: HighWire-hosted journal article supplement (https://erj.ersjournals.com/content/56/3/1902129)

**Supplementary File 3: Contour plots showing predicted values for FEV<sub>1</sub> and FVC in both male and female at 2.5th centile and 5th centile**

**(ERJ manuscript number ERJ-02129-2019.R2)**

**Contour plot of FEV<sub>1</sub> predicted values for Females**

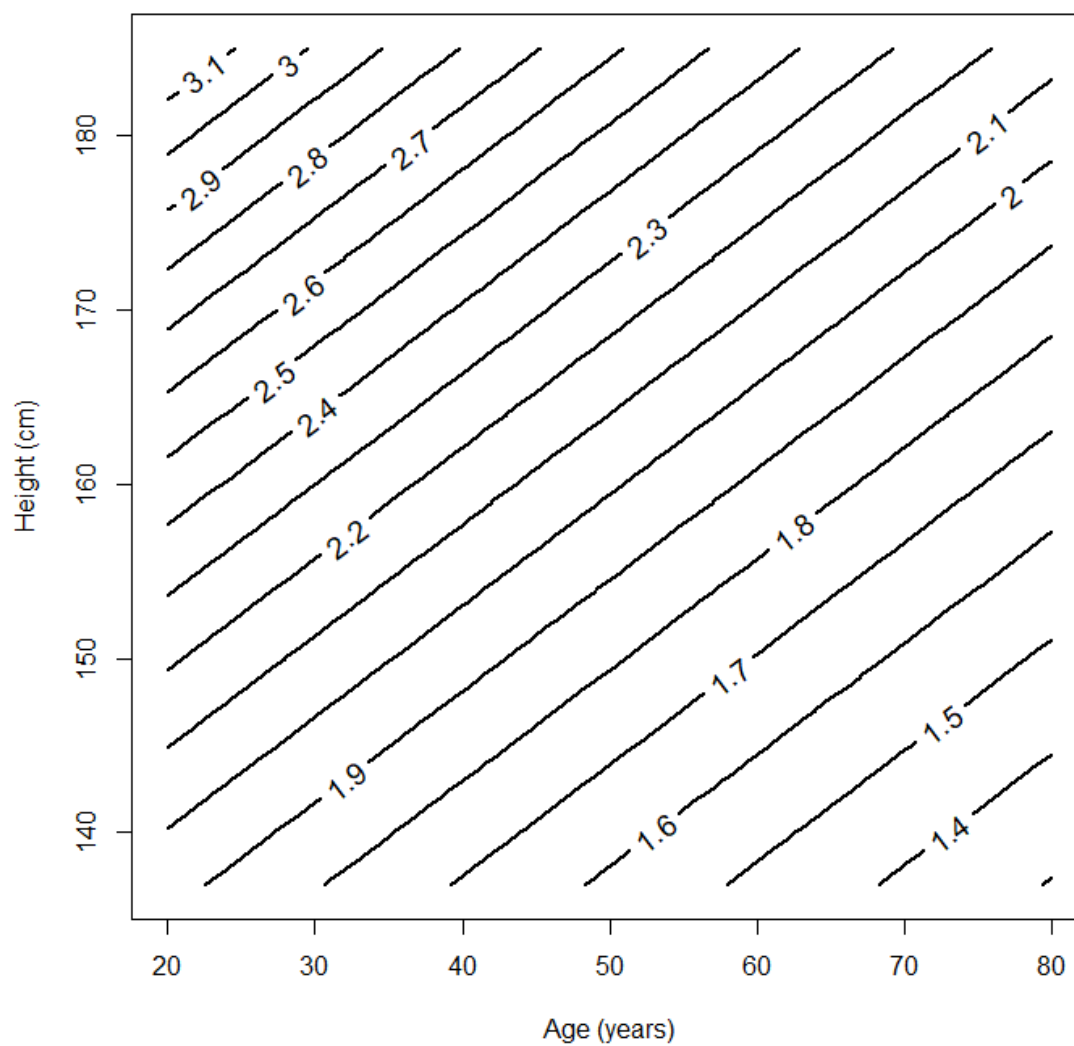

**Supplementary File 3: Contour plots showing predicted values for FEV<sub>1</sub> and FVC in both male and female at 2.5th centile and 5th centile**

**(ERJ manuscript number ERJ-02129-2019.R2)**

**Contour plot of 5th centile for FEV<sub>1</sub> in Females**

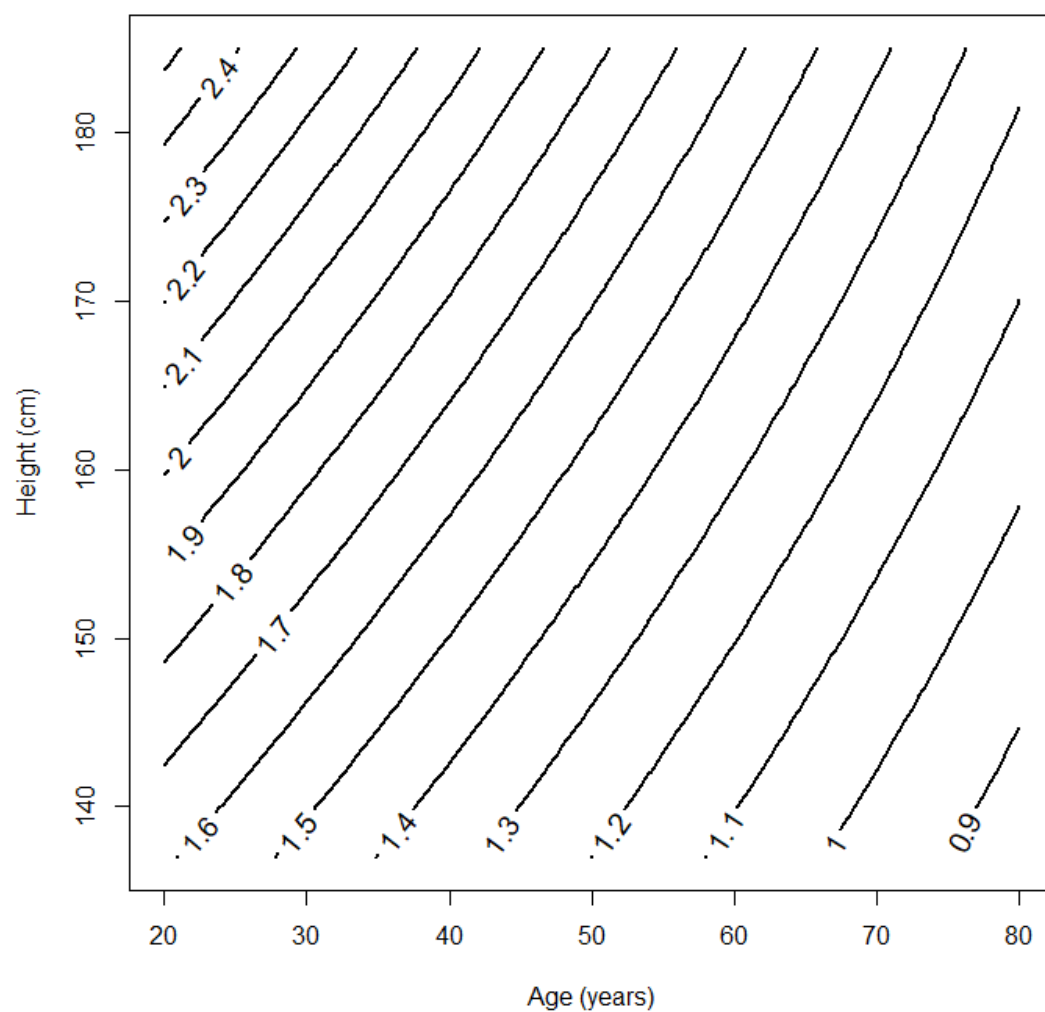

**Supplementary File 3: Contour plots showing predicted values for FEV<sub>1</sub> and FVC in both male and female at 2.5th centile and 5th centile**

**(ERJ manuscript number ERJ-02129-2019.R2)**

**Contour plot of 2.5th centile for FEV<sub>1</sub> in Females**

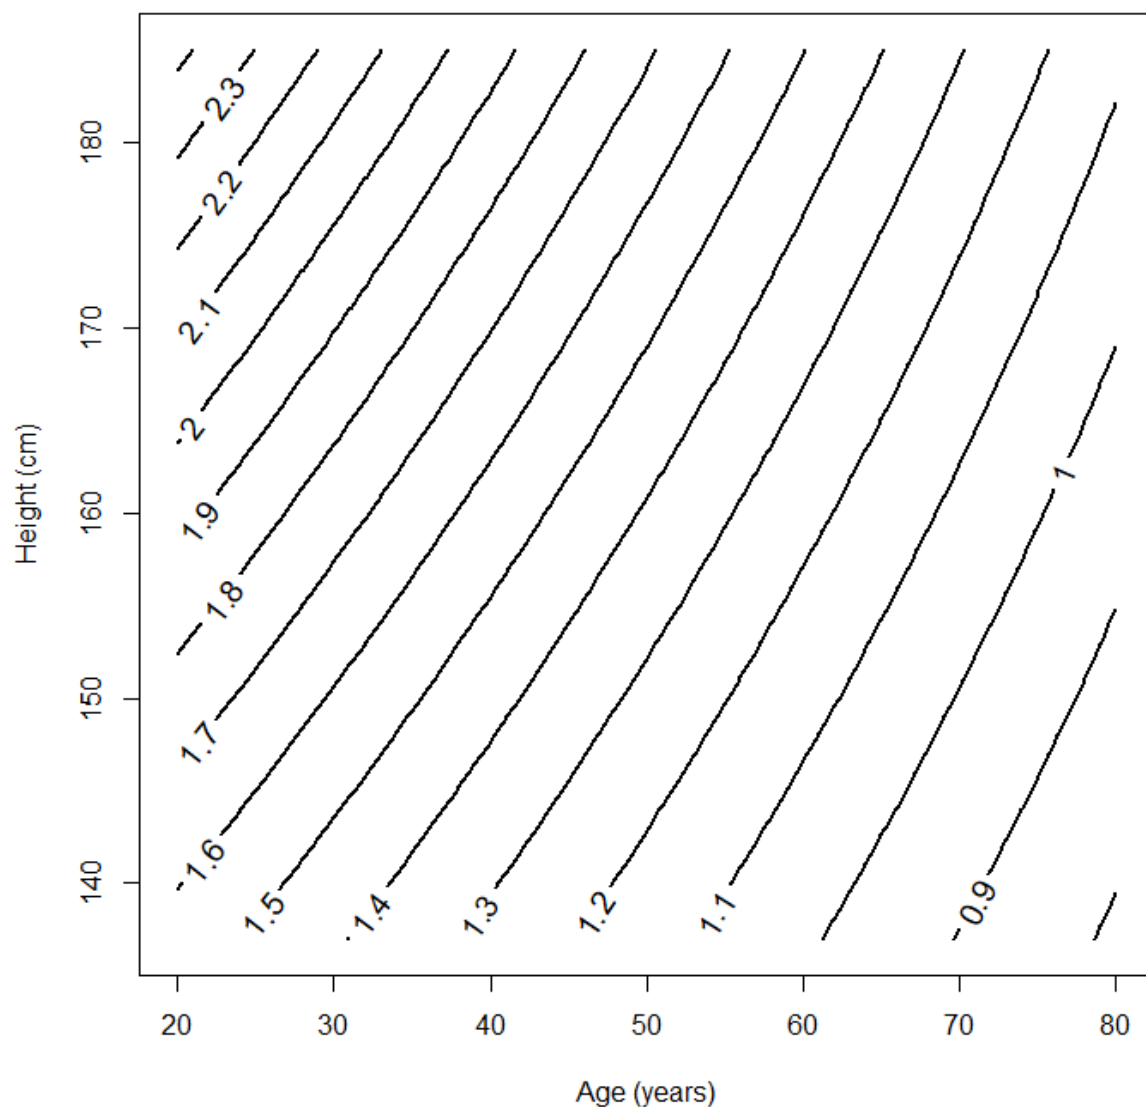

**Supplementary File 3: Contour plots showing predicted values for FEV<sub>1</sub> and FVC in both male and female at 2.5th centile and 5th centile**

**(ERJ manuscript number ERJ-02129-2019.R2)**

**Contour plot of FEV<sub>1</sub> predicted values for Males**

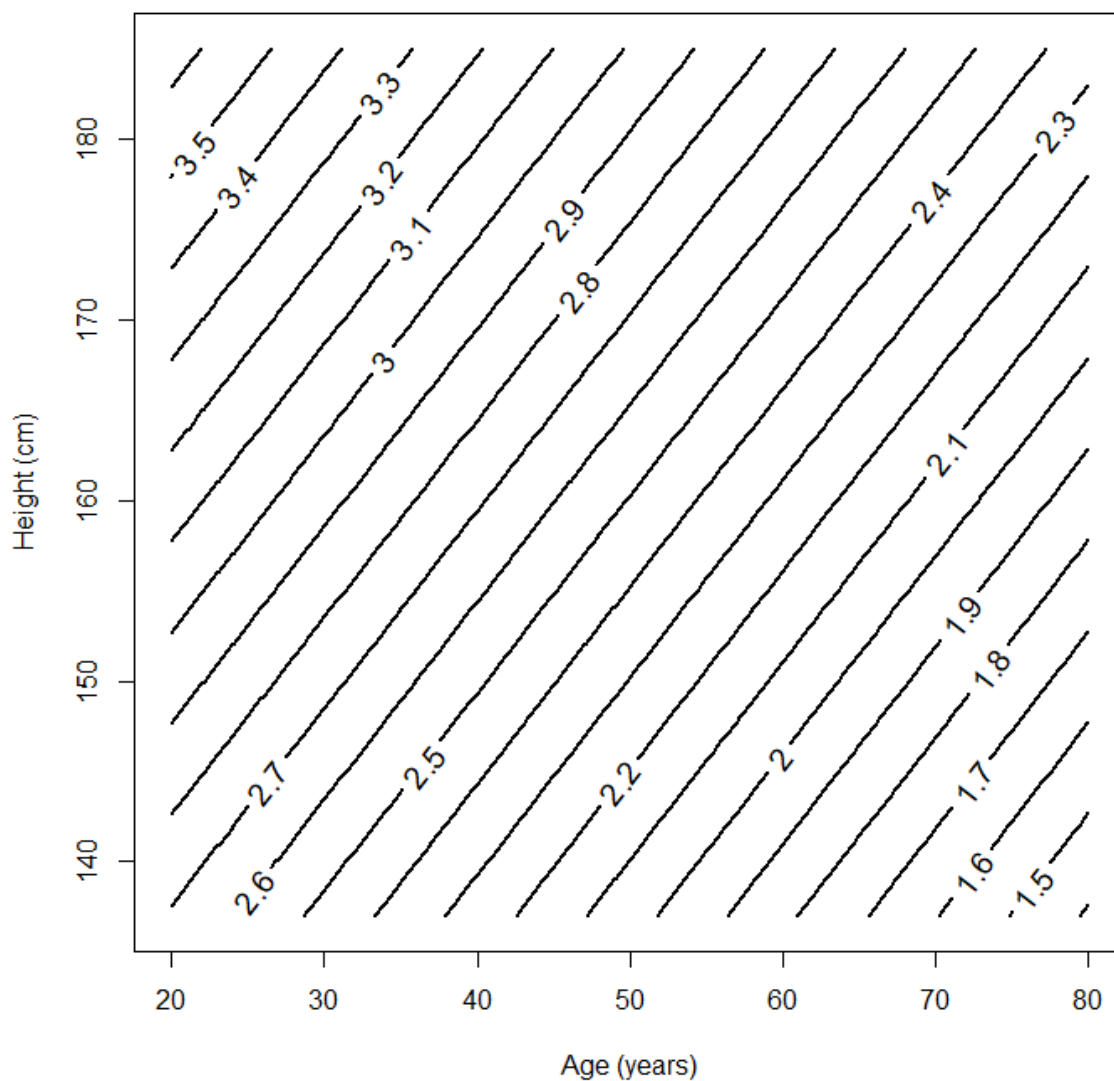

**Supplementary File 3: Contour plots showing predicted values for FEV<sub>1</sub> and FVC in both male and female at 2.5th centile and 5th centile**

**(ERJ manuscript number ERJ-02129-2019.R2)**

**Contour plot of 5th centile for FEV<sub>1</sub> in Males**

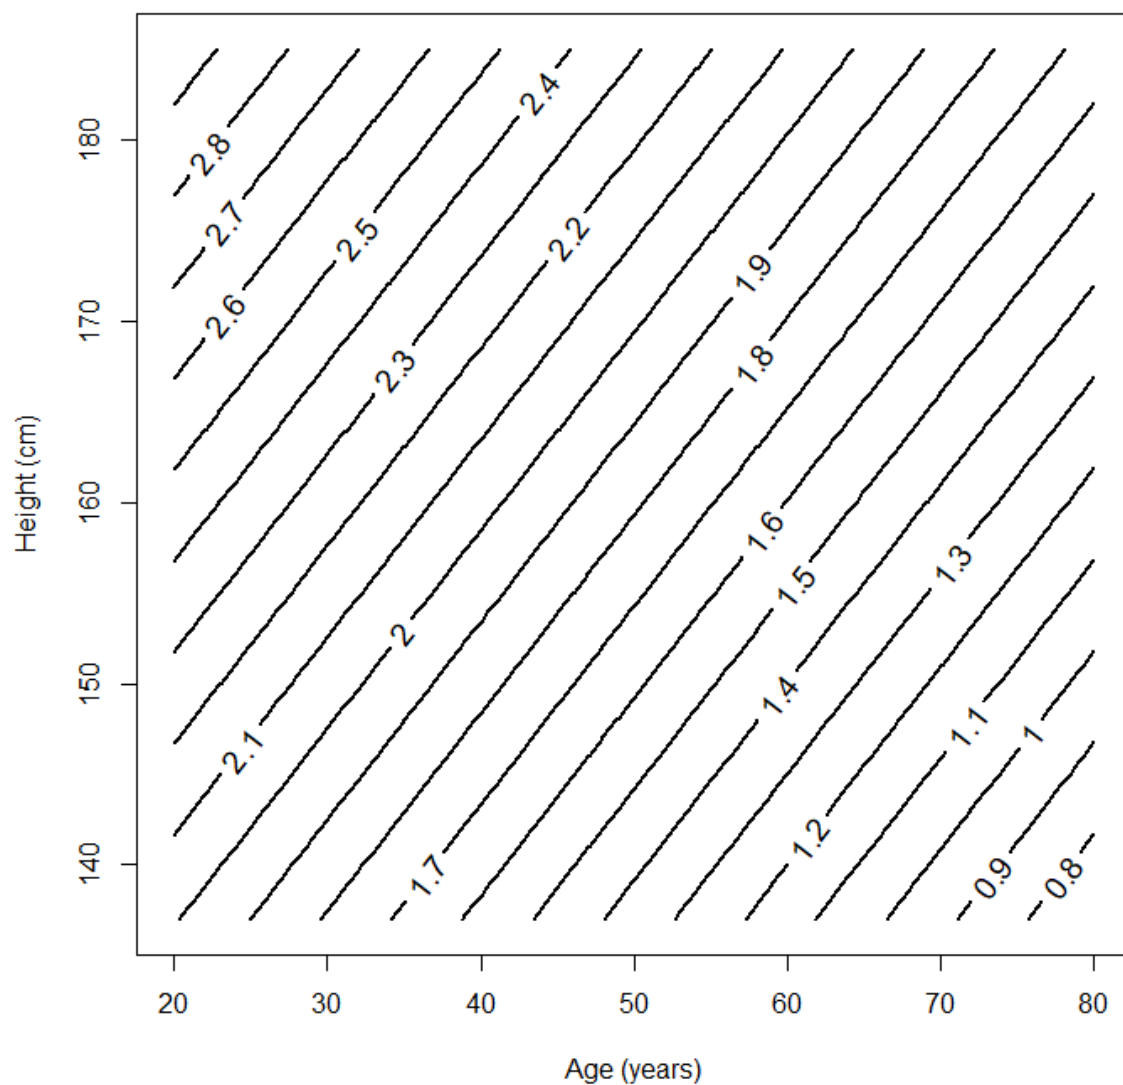

**Supplementary File 3: Contour plots showing predicted values for FEV<sub>1</sub> and FVC in both male and female at 2.5th centile and 5th centile**

**(ERJ manuscript number ERJ-02129-2019.R2)**

**Contour plot of 2.5th centile for FEV<sub>1</sub> in Males**

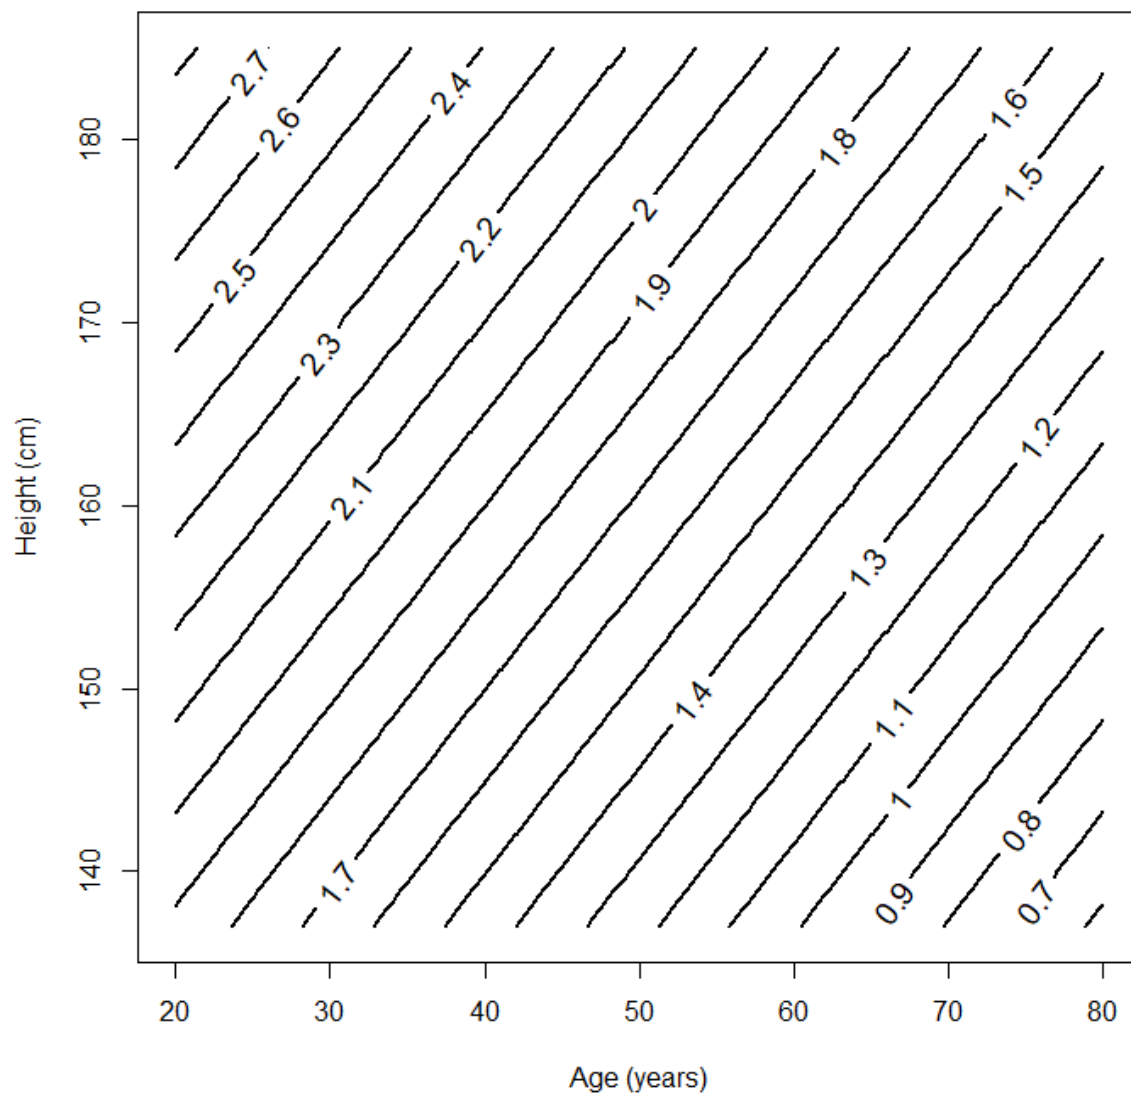

**Supplementary File 3: Contour plots showing predicted values for FEV<sub>1</sub> and FVC in both male and female at 2.5th centile and 5th centile**

**(ERJ manuscript number ERJ-02129-2019.R2)**

**Contour plot of FVC predicted values for Females**

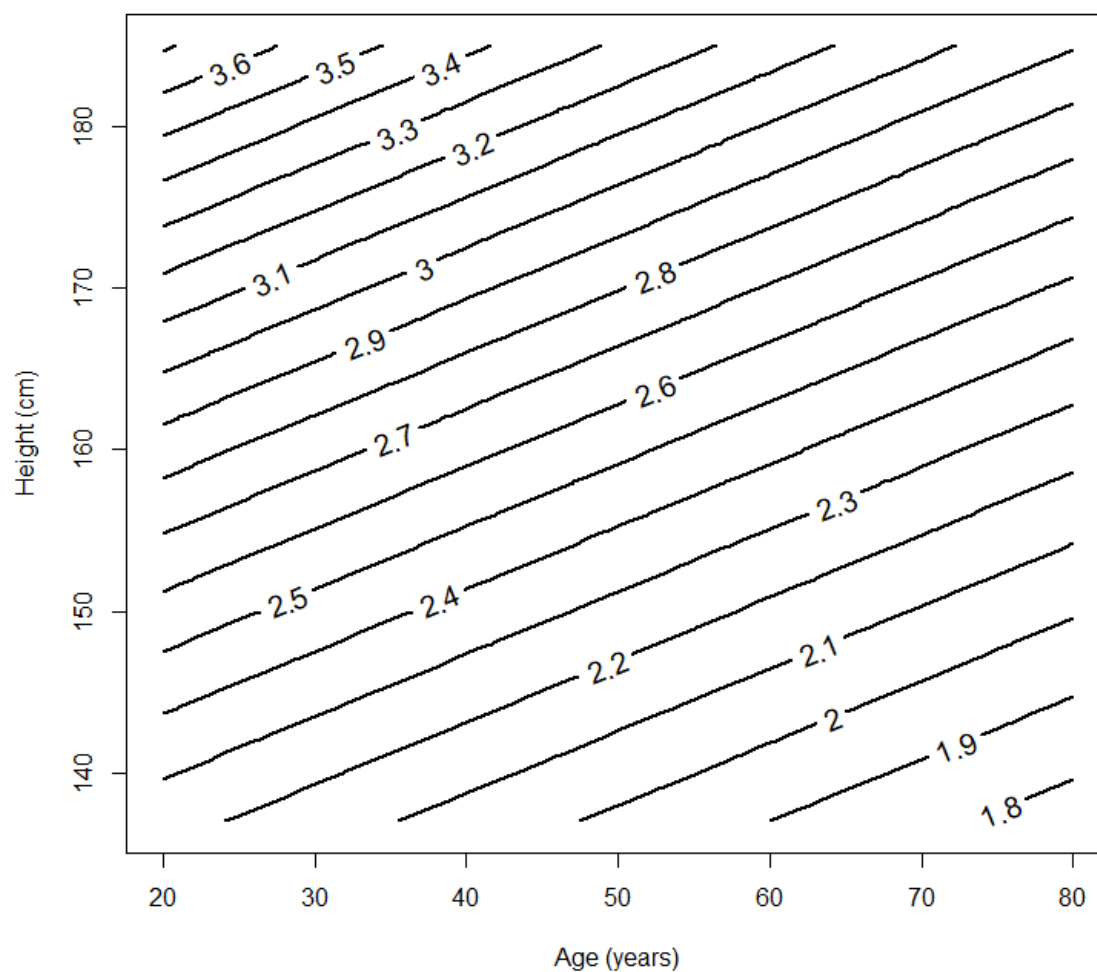

**Supplementary File 3: Contour plots showing predicted values for FEV<sub>1</sub> and FVC in both male and female at 2.5th centile and 5th centile**

**(ERJ manuscript number ERJ-02129-2019.R2)**

**Contour plot of 5th centile for FVC in Females**

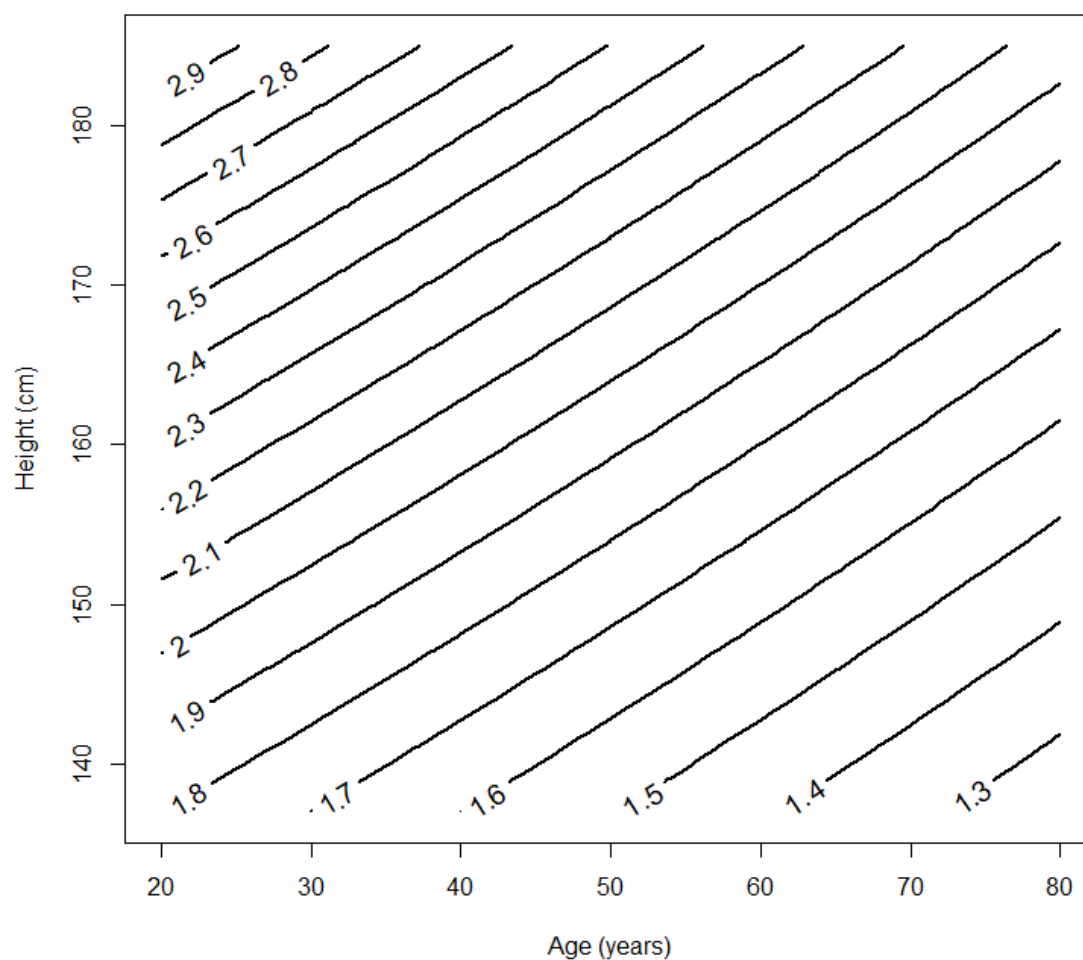



**Supplementary File 3: Contour plots showing predicted values for FEV<sub>1</sub> and FVC in both male and female at 2.5th centile and 5th centile**

**(ERJ manuscript number ERJ-02129-2019.R2)**

**Contour plot of 2.5th centile for FVC in Females**

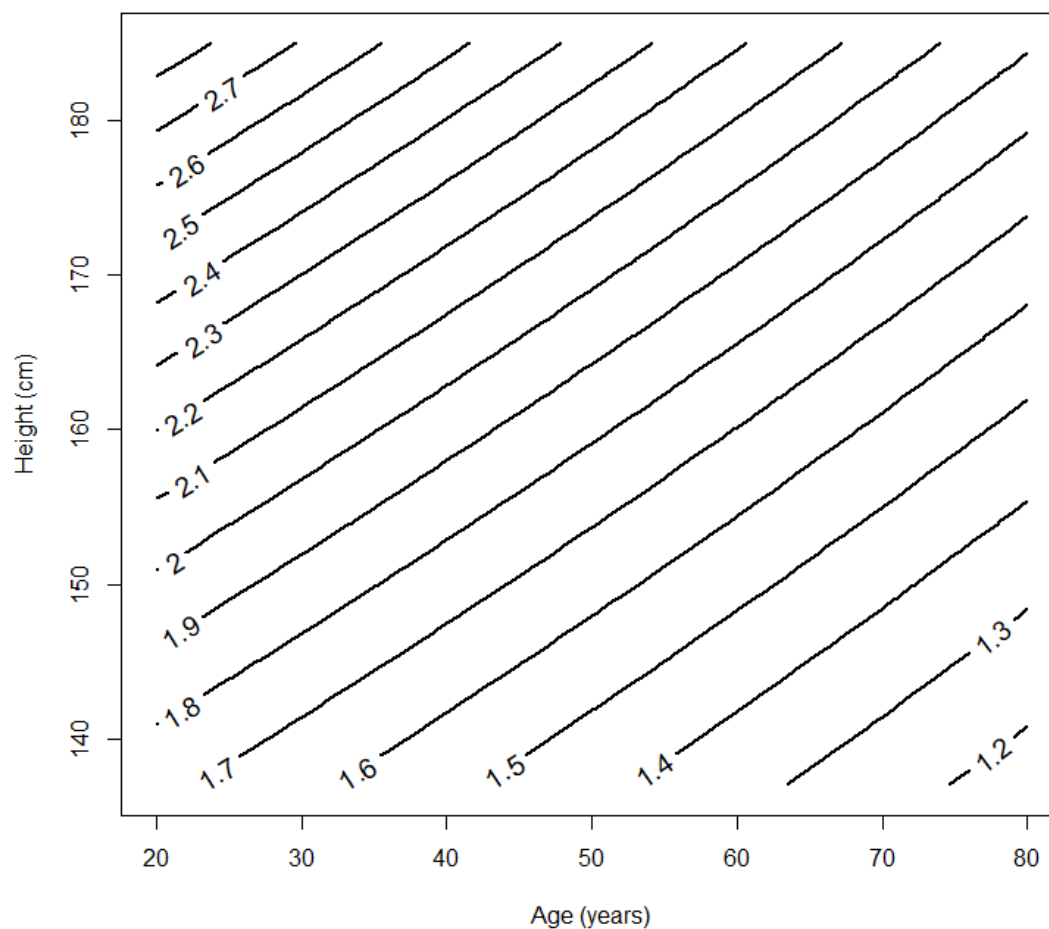

**Supplementary File 3: Contour plots showing predicted values for FEV<sub>1</sub> and FVC in both male and female at 2.5th centile and 5th centile**

**(ERJ manuscript number ERJ-02129-2019.R2)**

**Contour plot of FVC predicted values for Males**

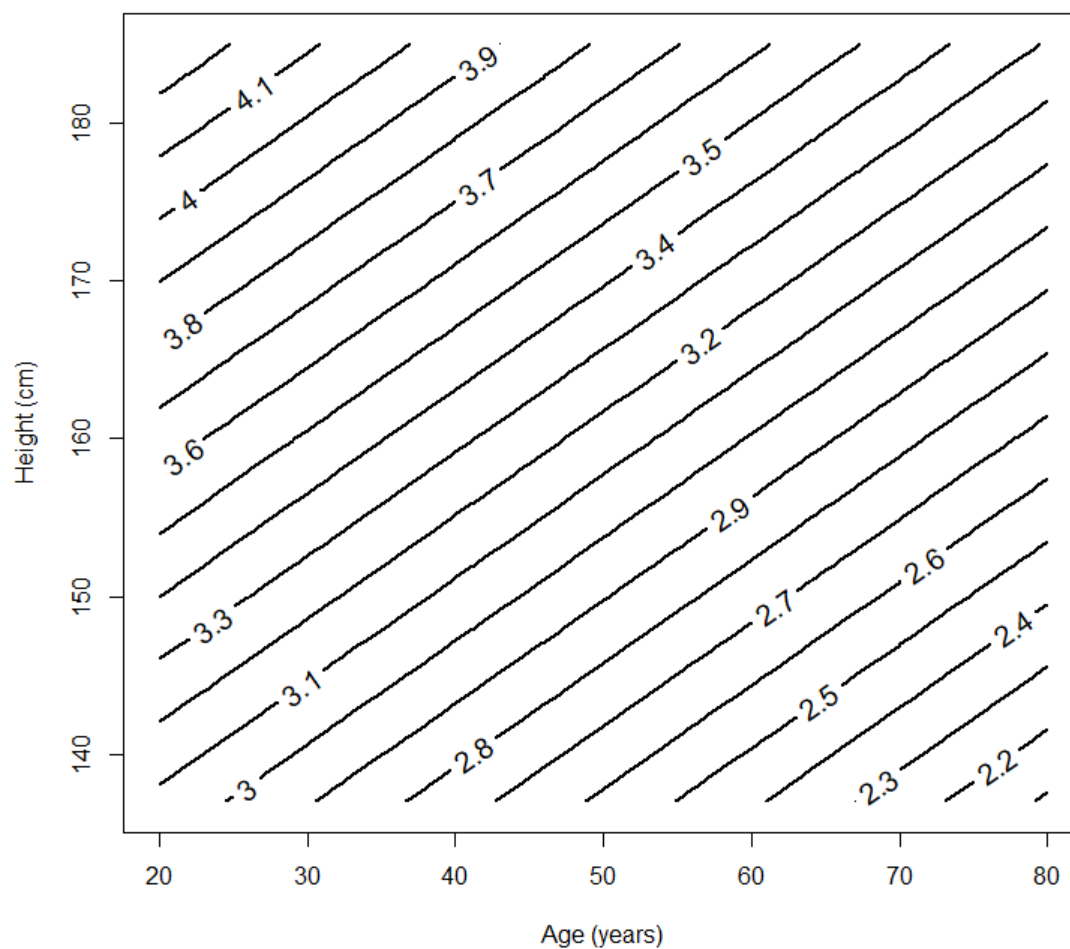

**Supplementary File 3: Contour plots showing predicted values for FEV<sub>1</sub> and FVC in both male and female at 2.5th centile and 5th centile**

**(ERJ manuscript number ERJ-02129-2019.R2)**

**Contour plot of 5th centile for FVC in Males**

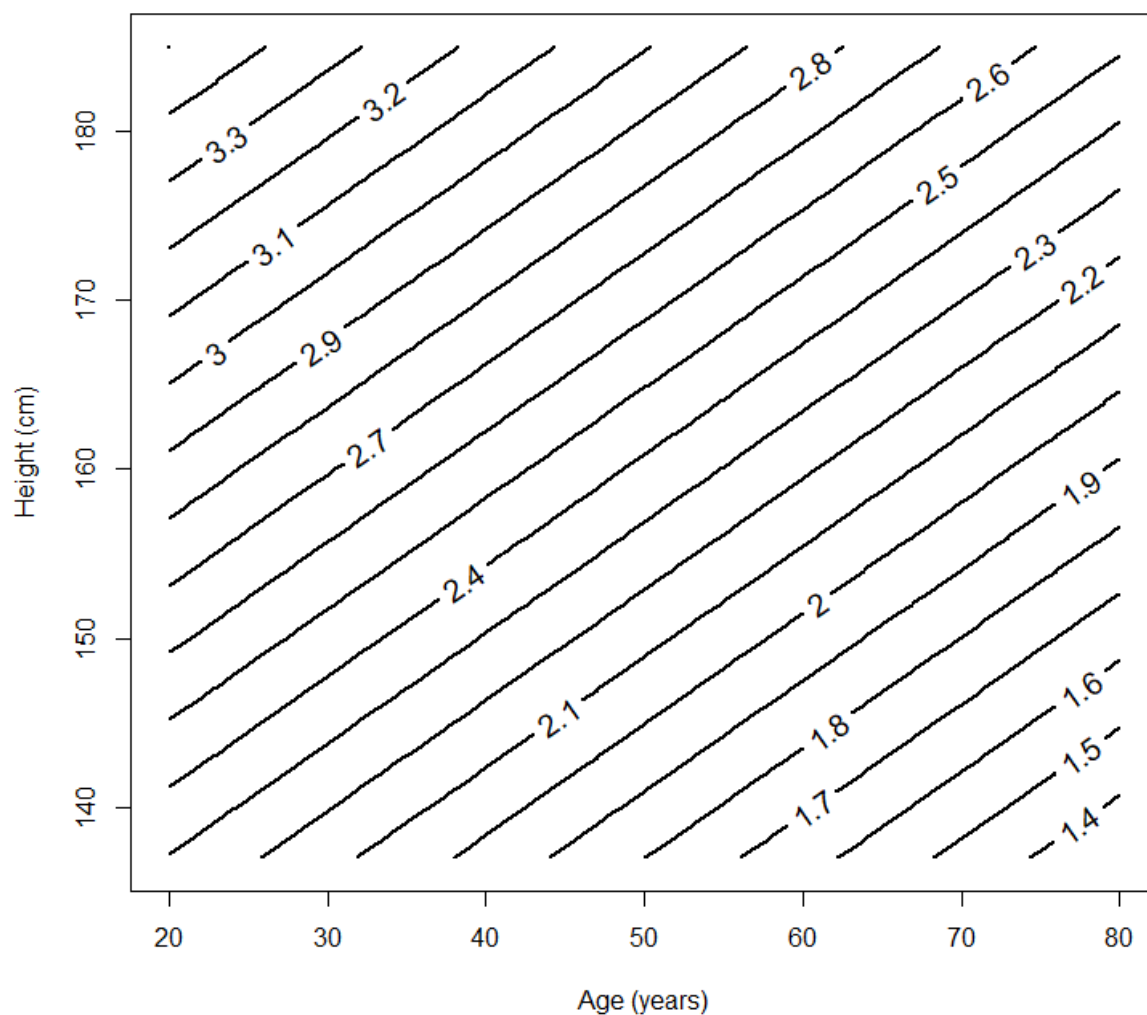

**Supplementary File 3: Contour plots showing predicted values for FEV<sub>1</sub> and FVC in both male and female at 2.5th centile and 5th centile**

**(ERJ manuscript number ERJ-02129-2019.R2)**

**Contour plot of 2.5th centile for FVC in Males**

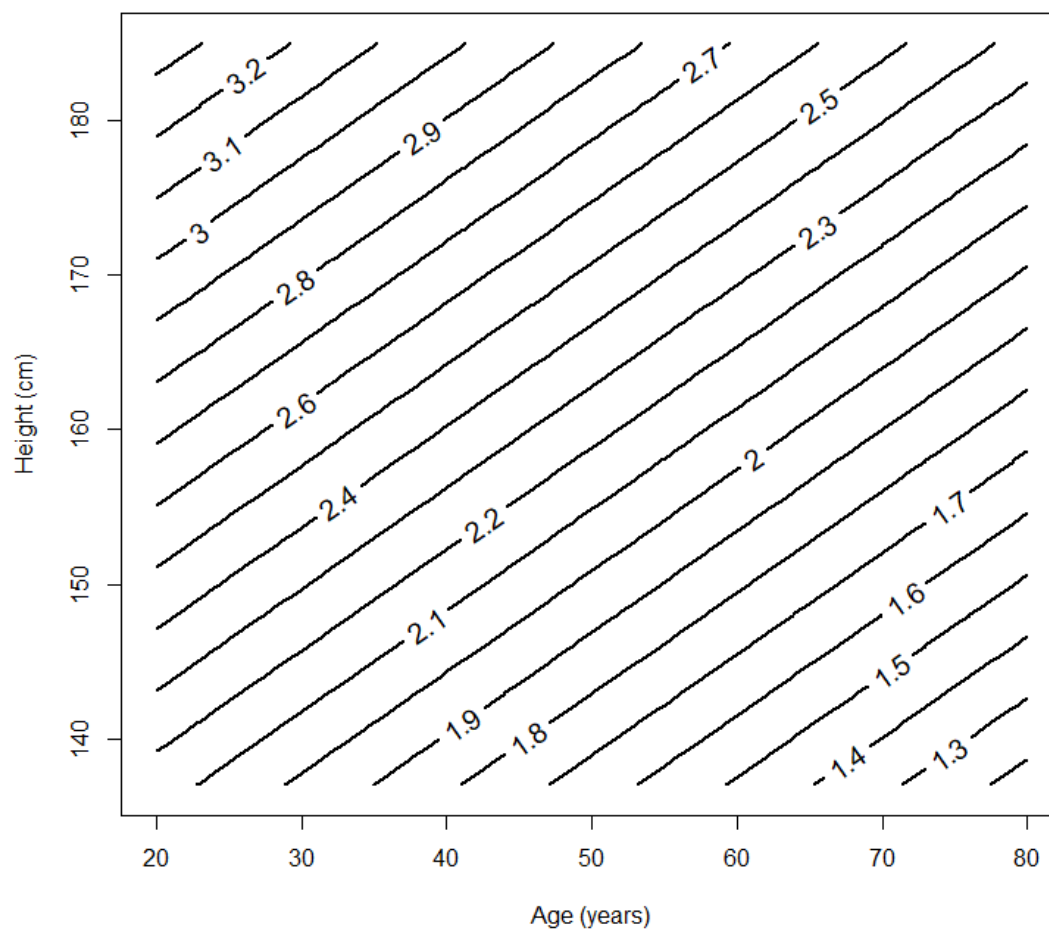

Supplement: inline-supplementary-material-3 [file inline-supplementary-material-3.pdf]
