# Supplementary material
Source: HighWire-hosted journal article supplement (https://erj.ersjournals.com/content/56/3/1902129)
Supplement: inline-supplementary-material-1 [file inline-supplementary-material-1.pdf]

## Supplementary File 1: BOLD questions used to define “Healthy”

(ERJ manuscript number ERJ-02129-2019.R2)

(Reference: Buist AS, Vollmer WM, Sullivan SD, Weiss KB, Lee TA, Menezes AM, Crapo RO, Jensen RL, Burney PG. The Burden of Obstructive Lung Disease Initiative (BOLD): rationale and design. *COPD* 2005; 2: 277-283.)

| Q#             | Topic of the Questions    |
|----------------|---------------------------|
| Q1001          | Cough                     |
| Q1002          | Phlegm                    |
| Q1003          | Wheezing/Whistling        |
| Q1004          | Breathlessness            |
| Q1005 to Q1011 | Disorders                 |
| Q1012          | Tobacco Smoking           |
| Q1013 to Q1014 | Occupational Exposure     |
| Q1015 to Q1021 | Additional Co-morbidities |
