# Supplementary material
Source: HighWire-hosted journal article supplement (https://erj.ersjournals.com/content/56/3/1902129)
Supplement: inline-supplementary-material-4 [file inline-supplementary-material-4.pdf]

Supplementary File 4: Bland-Altman plots of predicted values and residuals comparing our current models with GLI Code 5 (Other/Mixed)

(ERJ manuscript number ERJ-02129-2019.R2)

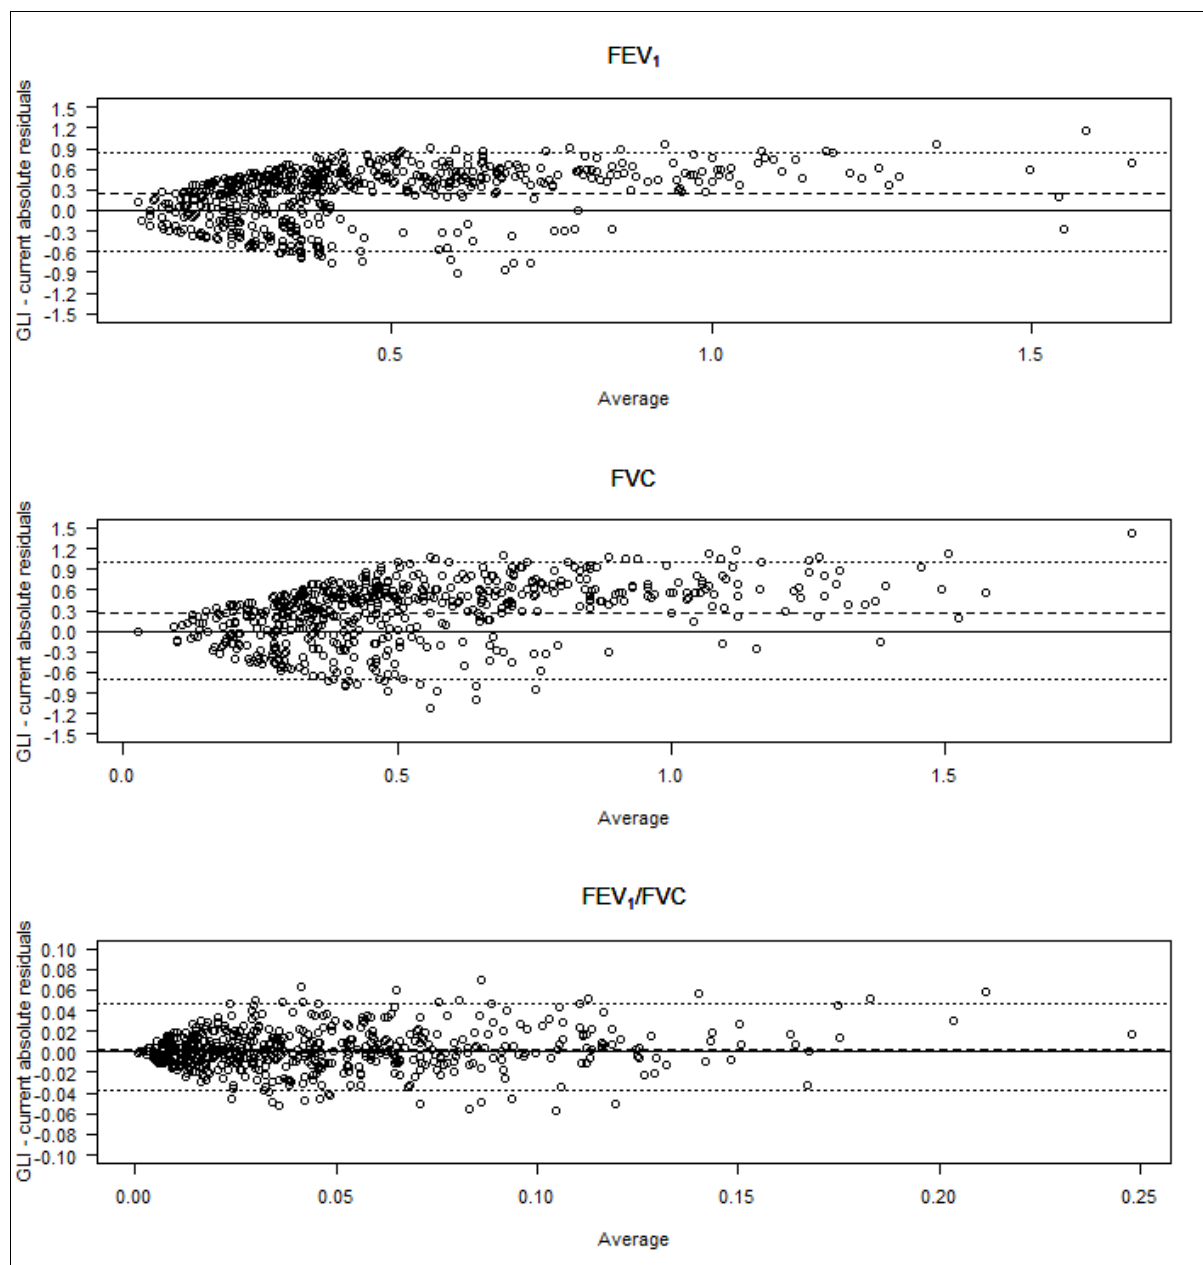

**Figure A:** Bland-Altman plots showing the comparison of the absolute value of spirometry residual values obtained from the current study models with the absolute value of residuals from GLI Code 5 (Other/Mixed) models *in males*. Mean differences are shown as dashed lines and percentile 95% limits of agreement as dotted lines.

**Supplementary File 4: Bland-Altman plots of predicted values and residuals comparing our current models with GLI Code 5 (Other/Mixed)**

**(ERJ manuscript number ERJ-02129-2019.R2)**

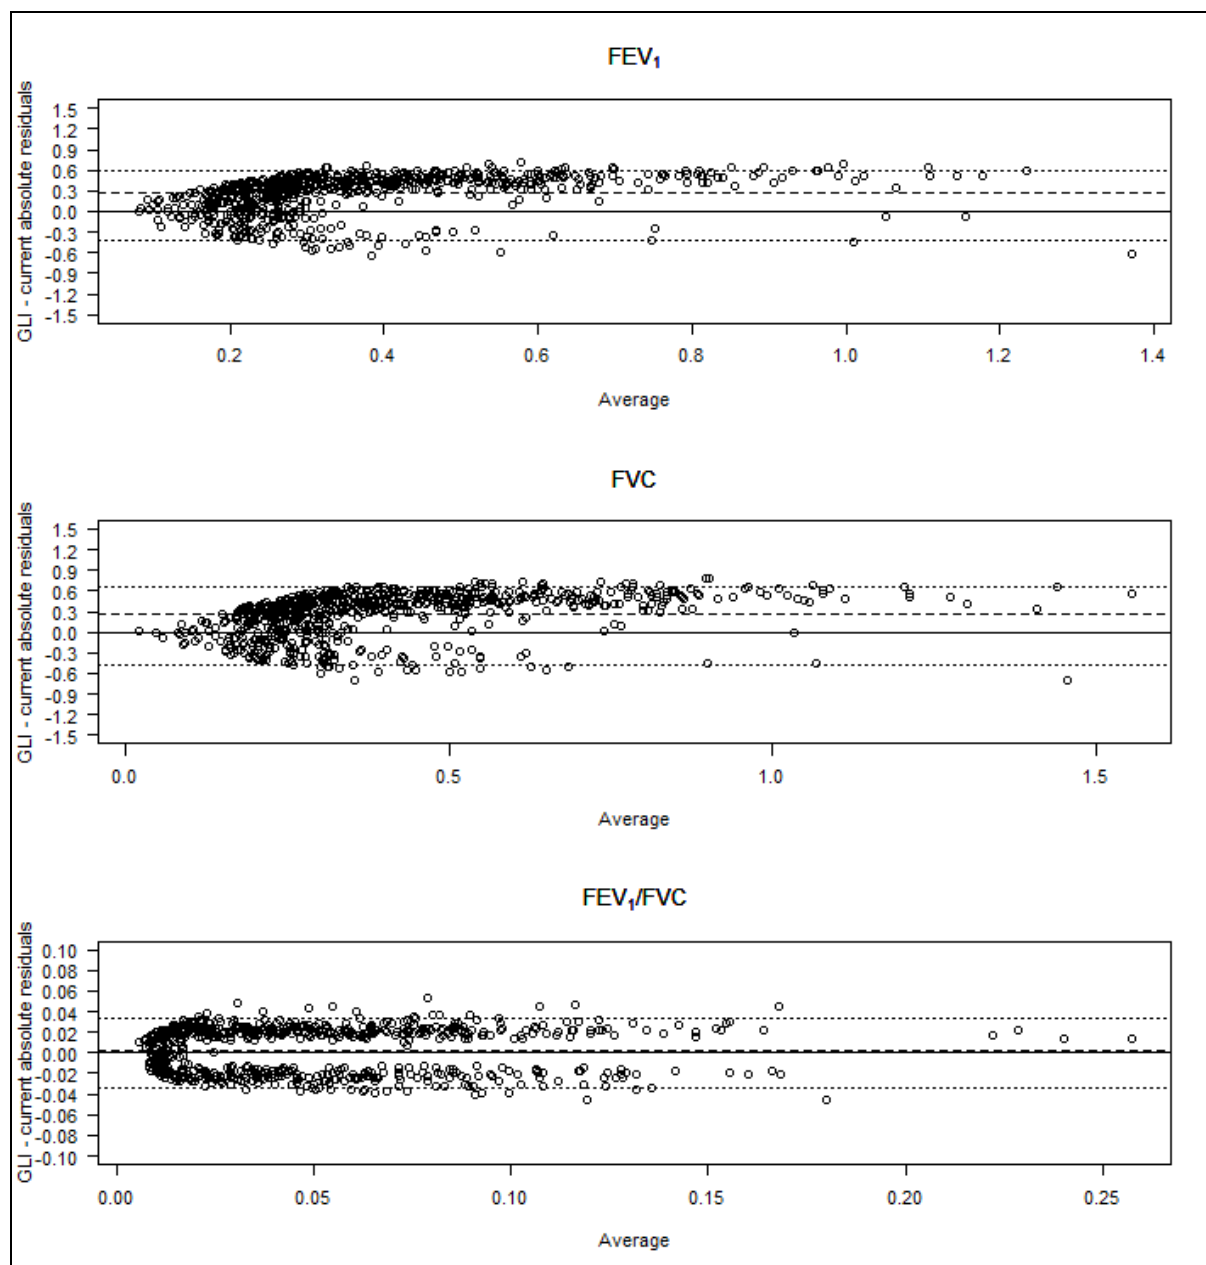

**Figure B:** Bland-Altman plots showing the comparison of the absolute value of spirometry residual values obtained from the current study models with the absolute value of residuals from GLI Code 5 (Other/Mixed) models *in females*. Mean differences are shown as dashed lines and percentile 95% limits of agreement as dotted lines.

Observed patterns are consistent with the differences seen between the predicted values shown in Figure 4B.
